# The American Journal of Psychiatry

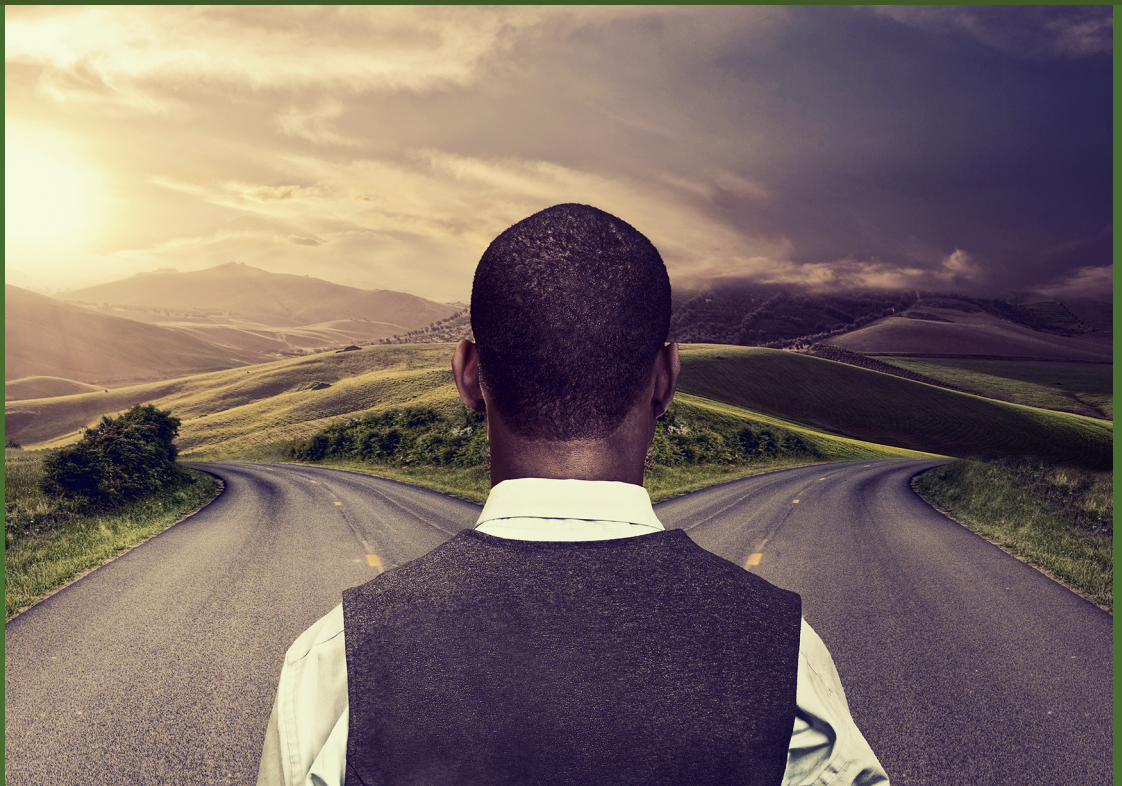

Effects of Patient Preferences on Outcomes in the Predictors of Remission  
in Depression to Individual and Combined Treatments (PReDICT) Study

Irritability in Youths: A Translational Model

Association of Elevated Reward Prediction Error Response  
With Weight Gain in Adolescent Anorexia Nervosa

Selective Loss of Smaller Spines in Schizophrenia
