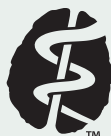

# The American Journal of Psychiatry

Official Journal of the American Psychiatric Association

## Officers 2016–2017

### President

Maria A. Oquendo, M.D., Ph.D.

### President-Elect

Anita S. Everett, M.D.

### Treasurer

Bruce J. Schwartz, M.D.

### Secretary

Altha J. Stewart, M.D.

### Assembly

#### Speaker

Daniel J. Anzia, M.D.

#### Speaker-Elect

Theresa M. Miskimen, M.D.

#### Recorder

James R. Batterson, M.D.

### Office of the CEO and Medical Director

#### CEO and Medical Director

Saul Levin, M.D., M.P.A.

### Board of Trustees

Uchenna Achebe, M.D., M.P.H.

Jeffrey Akaka, M.D.

Lama Bazzi, M.D.

R. Scott Benson, M.D.

Renée L. Binder, M.D.

Ronald M. Burd, M.D.

Stella Cai, M.D.

Jeffrey L. Geller, M.D., M.P.H.

Jeffrey A. Lieberman, M.D.

Roger Peele, M.D.

Vivian B. Pender, M.D.

Gail E. Robinson, M.D.

Paul Summergrad, M.D.

Richard F. Summers, M.D.

Melinda Young, M.D.

*APA Officers for 2017–2018 took office at the conclusion of the APA Annual Meeting, after this issue went to press. The July issue of The American Journal of Psychiatry will feature these office-holders.*

## Editorial Board

### Editor

Robert Freedman, M.D.

### Deputy Editors

David A. Lewis, M.D.

Robert Michels, M.D.

Daniel S. Pine, M.D.

A. John Rush, M.D.

Susan K. Schultz, M.D.

Carol A. Tamminga, M.D.

### Associate Editors

Alan Brown, M.D., M.P.H.

Tyrone Cannon, Ph.D.

Benjamin G. Druss, M.D., M.P.H.

Felton Earls, M.D.

Graham J. Emslie, M.D.

Yasmin Hurd, Ph.D.

Joan L. Luby, M.D.

Constantine G. Lyketsos, M.D., M.H.S.

Helen S. Mayberg, M.D., F.R.C.P.C.

Terrie E. Moffitt, Ph.D.

Rajesh Narendran, M.D.

Roy Perlis, M.D.

Anita Thapar, M.B.B.Ch., F.R.C.Psych.,

Ph.D., F.Med.Sci.

Mauricio Tohen, M.D., Dr.PH., M.B.A.

Eduard Vieta, M.D., Ph.D.

Katherine L. Wisner, M.D., M.S.

Xin Yu, M.D.

### Editor Emerita

Nancy C. Andreasen, M.D., Ph.D.

### Former Editors

Amariah Brigham, M.D., 1844–1849

T. Romeyn Beck, M.D., 1849–1854

John P. Gray, M.D., 1854–1886

G. Alder Blumer, M.D., 1886–1894

Richard Dewey, M.D., 1894–1897

Henry M. Hurd, M.D., 1897–1904

Edward N. Brush, M.D., 1904–1931

Clarence B. Farrar, M.D., 1931–1965

Francis J. Braceland, M.D., 1965–1978

John C. Nemiah, M.D., 1978–1993

### Editorial Staff

#### Executive Editor

Michael D. Roy

#### Senior Editors

John J. Guardiano, Ph.D.

Jane Weaver

#### Production Manager

Susan Westrate

#### Assistant Editor

Angela Moore

#### Online Content Manager

Michael Pogachar

#### Editorial Support Services Manager

Heidi Koch

#### Editorial Assistant

Linda LaCour

#### Spanish Content Manager

Sergi Casals, M.A.

#### Assistants to the Editors

Lois Lilienthal

Laura English

Rachel Hogg

Russell A. Scholl

### Publisher

Rebecca D. Rinehart
